# Supplementary material for: New amphiphilic block copolymer-modified electrodes for supercapacitors
Source: Royal Society of Chemistry journal article supplement (doi:10.1039/c7nj03427j), 2017-12-11
Supplement: c7nj03427j1.pdf [file c7nj03427j1.pdf]

## Supporting Information

### **New Amphiphilic Block Copolymer- Modified Electrode for Supercapacitors**

Zhen Wang<sup>b</sup>, Yongtao Tan<sup>a,b</sup>, Ying Liu<sup>a,b</sup>, Lengyuan Niu<sup>c</sup>, Lingbin Kong<sup>a,b</sup>, Long Kang<sup>a,b</sup>, Fen Ran<sup>a,b,\*</sup>

*<sup>a</sup> State Key Laboratory of Advanced Processing and Recycling of Non-ferrous Metals, Lanzhou University of Technology, Lanzhou 730050, P. R. China*

*<sup>b</sup> School of Material Science and Engineering, Lanzhou University of Technology, Lanzhou, 730050, Gansu, PR China*

*<sup>c</sup> Institute of Coordination Bond Metrology and Engineering, College of Materials Science and Engineering, China Jiliang University, Hangzhou 310018, PR China*

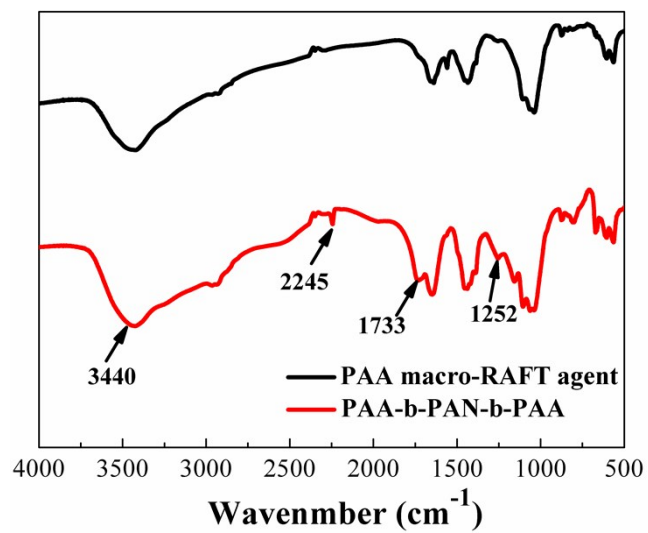

**Figure S1.** FTIR spectra for PAA macro-RAFT agent, and amphiphilic block copolymer PAA-*b*-PAN-*b*-PAA

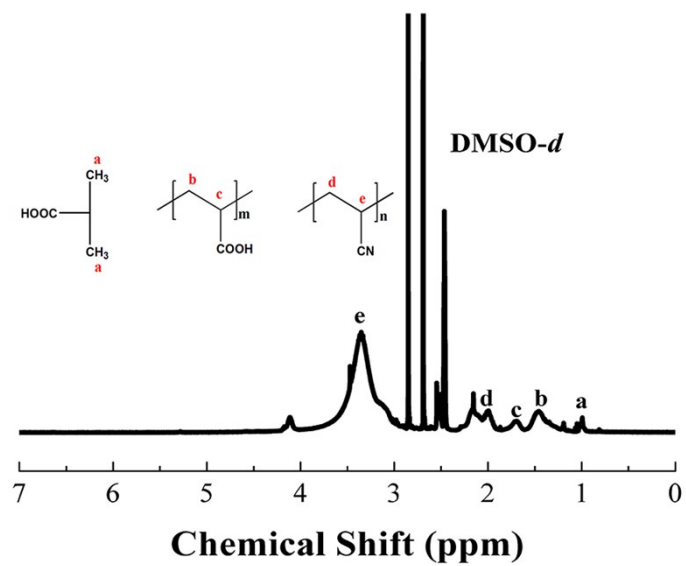

**Figure S2.** <sup>1</sup>H-NMR spectrum of amphiphilic block copolymer PAA-*b*-PAN-*b*-PAA (DMSO-*d* was used as solvent in the <sup>1</sup>H-NMR measurement)

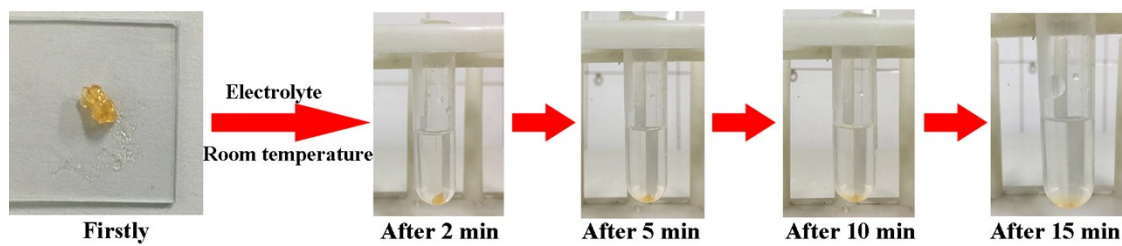

**Figure S3.** The stability of the ABC in the electrolyte

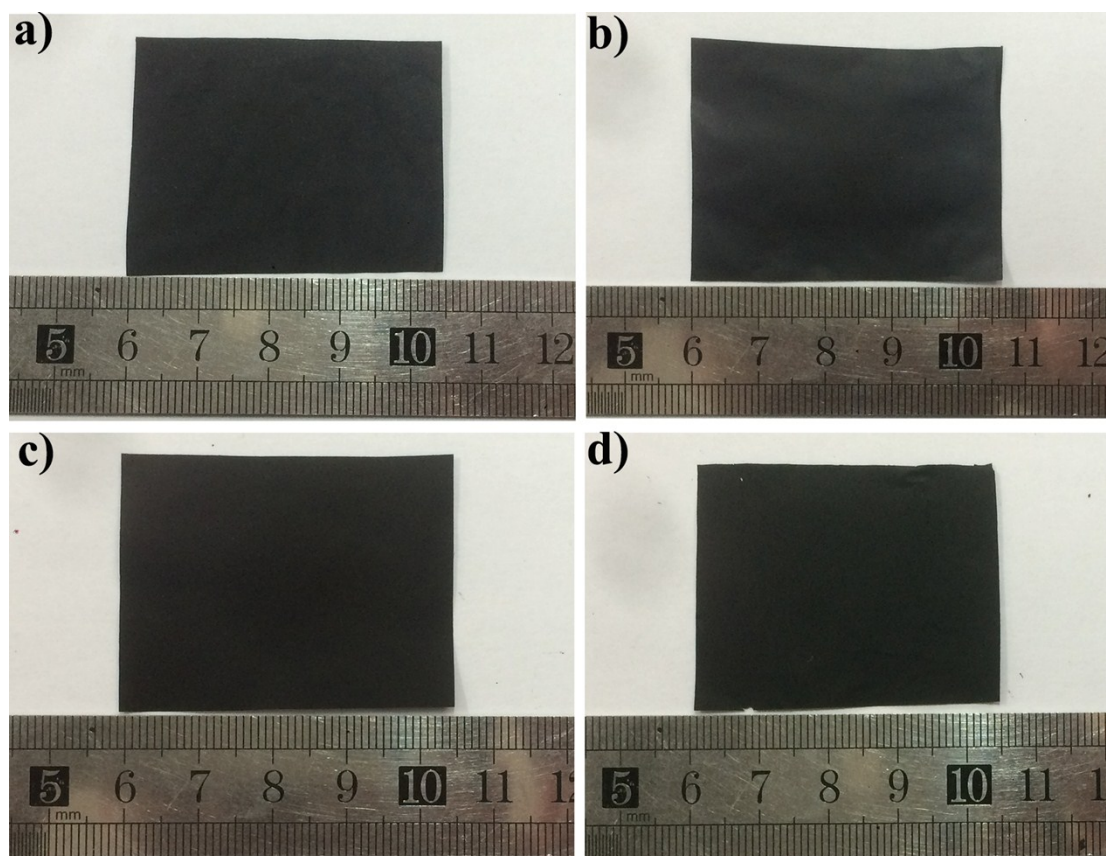

**Figure S4.** Photos of (a) F-ABC-0.0, (b) F-ABC-0.2, (c) F-ABC-0.5 and (d) F-ABC-0.7

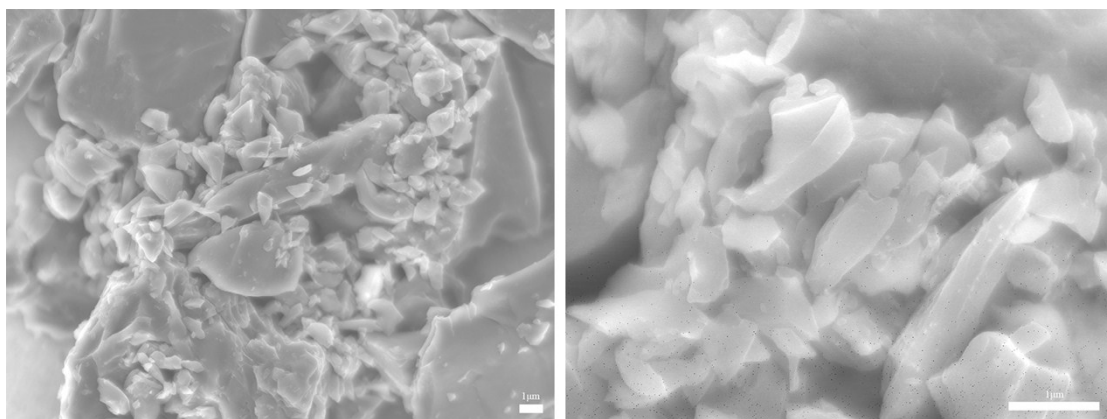

**Figure S5.** SEM images of activated carbon (AC)

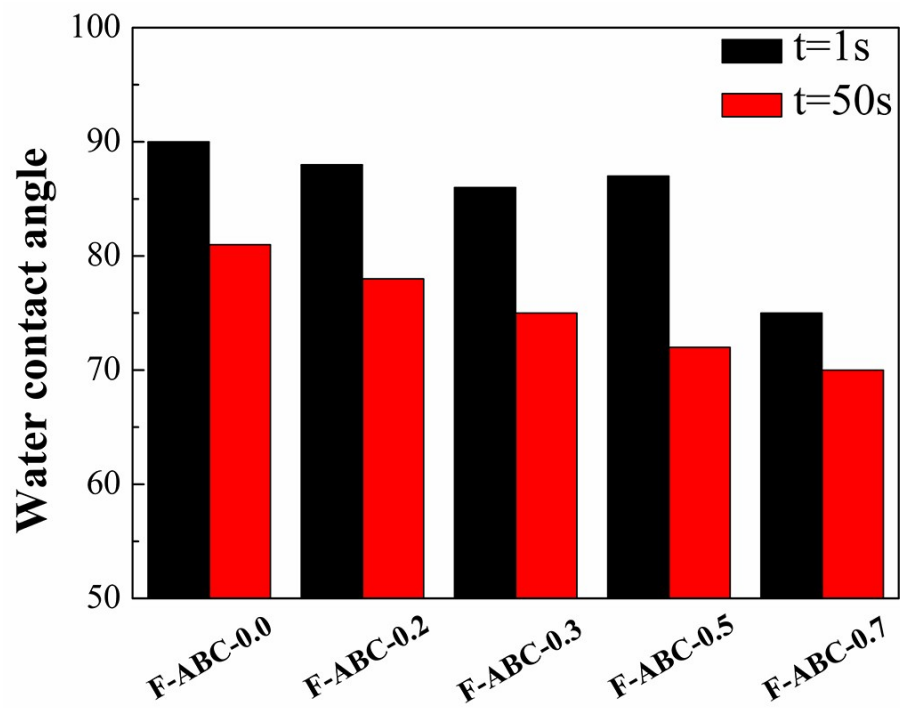

**Figure S6.** Water contact angle of F-ABC-0.0, F-ABC-0.2, F-ABC-0.3, F-ABC-0.5 and F-ABC-0.7

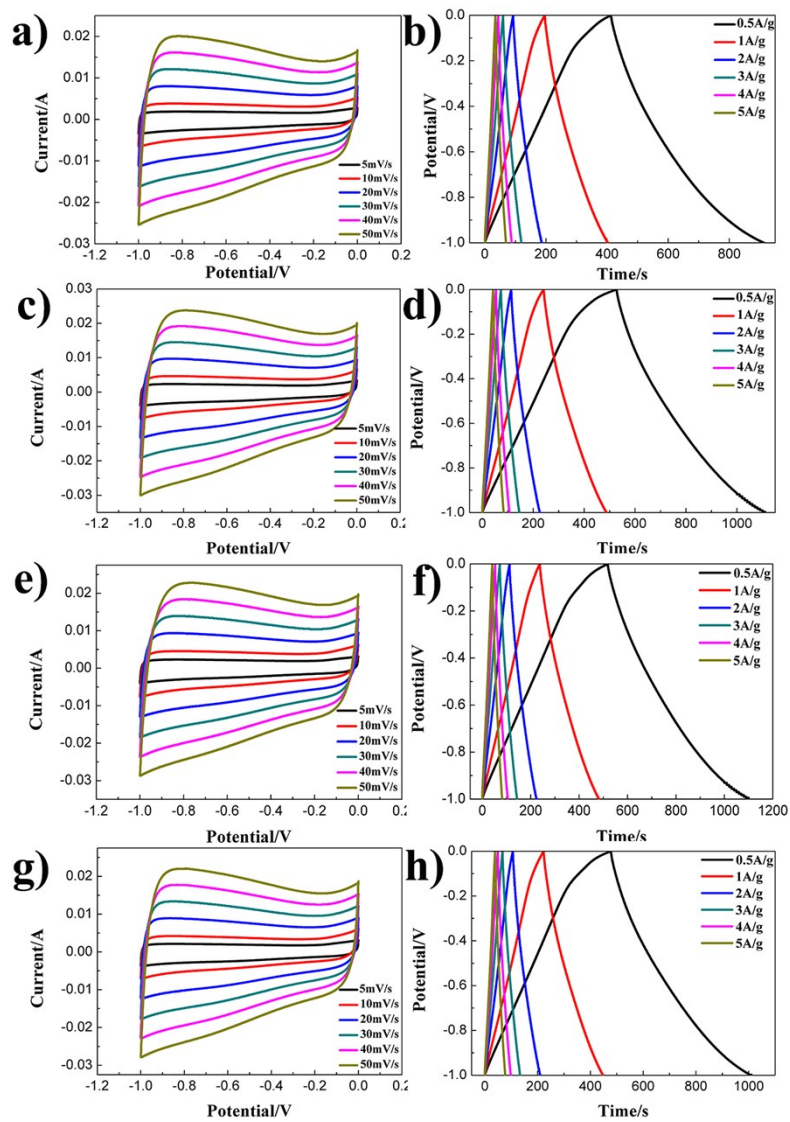

**Figure S7.** Cyclic voltammogram curves of F-ABCs: a) 0.00 g, c) 0.20 g, e) 0.50 g and g) 0.70 g; and galvanostatic charging-discharging curves of F-ABCs: b) 0.00 g, d) 0.20 g, f) 0.50 g and h) 0.70 g



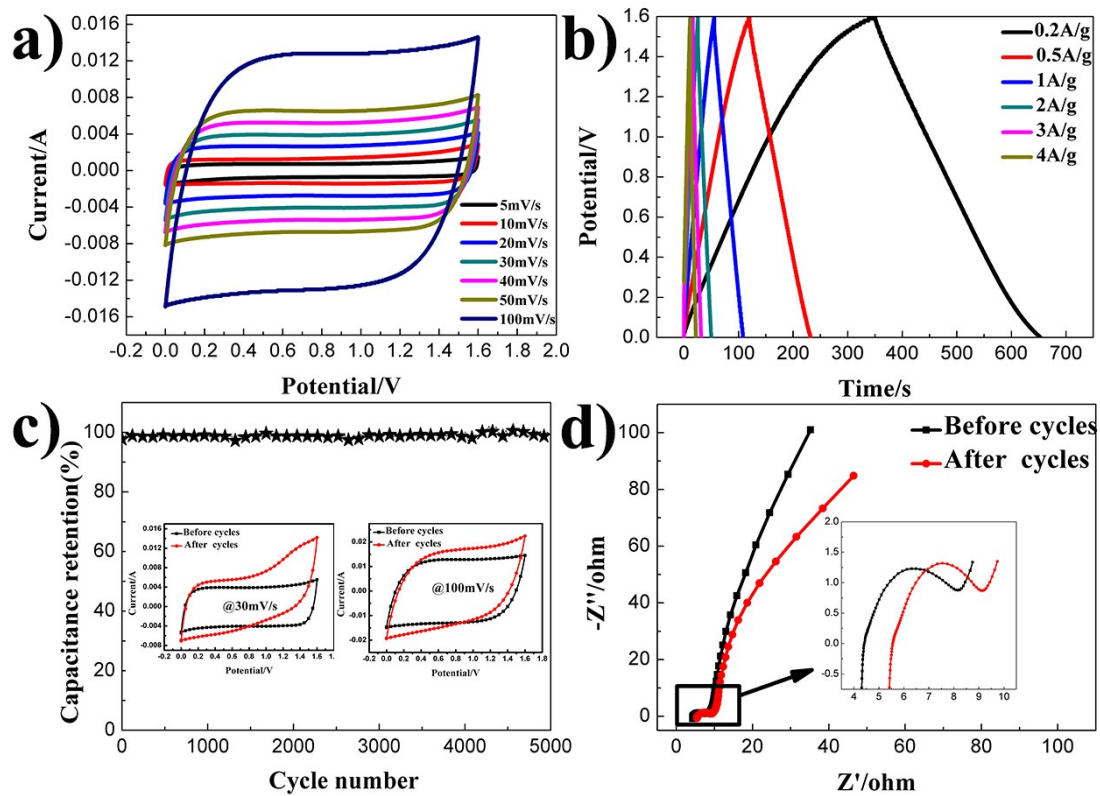

**Figure S8.** Electrochemical performance of symmetric supercapacitor assembled with F-ABC-0.0 in a two-electrode system: (a) cyclic voltammogram curves at different scan rates, (b) galvanostatic charging/discharging curves at different current densities, (c) cycling stability at 2 A/g. Insets are the CV curves before and after 5000 cycles at 30 mV/s (left) and 100 mV/s (right). (d) Electrochemical impedance spectroscopy before cycling and after 5000 cycles.

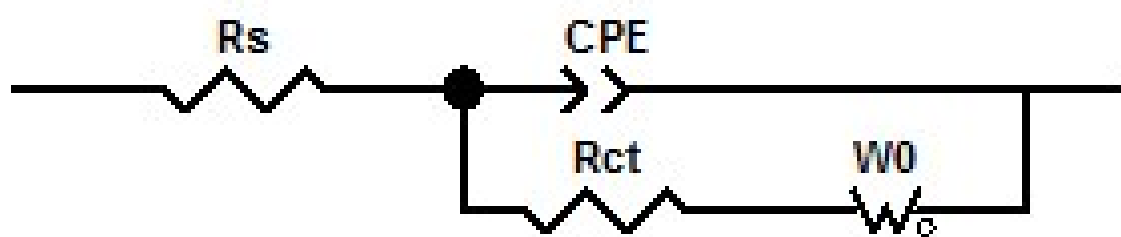

**Figure S9.** Equivalent circuit of all impedance spectra for different samples

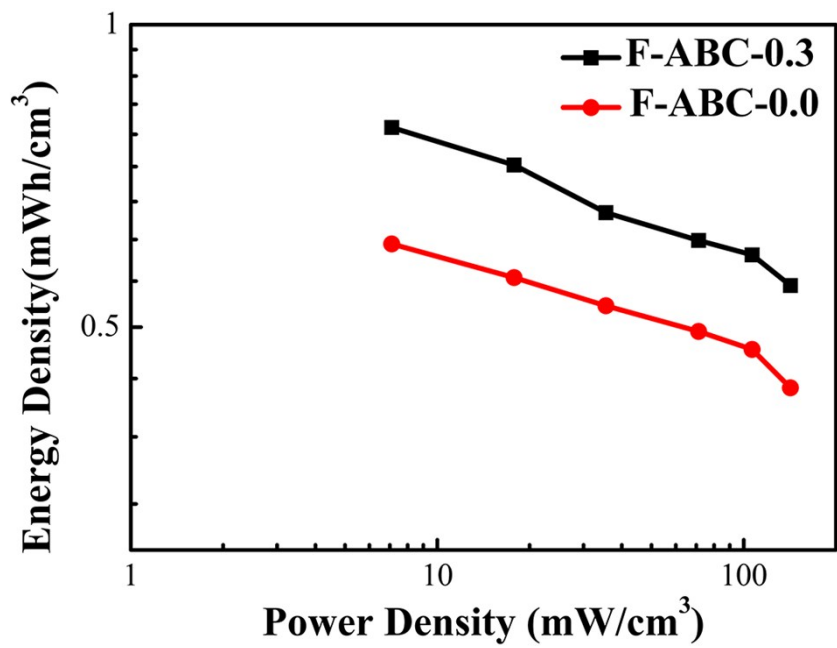

**Figure S10.** Volumetric energy/power density of SCs based on the overall device in this work

**Table S1.** Fitted parameters for EIS obtained by Zswinpwin software of different samples

| <b>Sample</b>              | <b>R<sub>s</sub> (Ω)</b> | <b>R<sub>CT</sub> (Ω)</b> | <b>R<sub>w</sub> (Ω)</b> |
|----------------------------|--------------------------|---------------------------|--------------------------|
| F-ABC-0.0//F-ABC-0.0<br>SC | 7.1                      | 0.01                      | 0.0218                   |
| F-ABC-0.3//F-ABC-0.3<br>SC | 6.912                    | 0.03                      | 0.0183                   |
